# Supplementary material for: An unexpected IgE anti-receptor binding domain response following natural infection and different types of SARS-CoV-2 vaccines
Source: PubMed Central journal article supplement — Sci Rep. 2024 Aug 28;14:20003. doi: 10.1038/s41598-024-71047-5 (PMC11358332; doi:10.1038/s41598-024-71047-5), 2024-08-28
Supplement: 41598_2024_71047_MOESM1_ESM.pdf [file 41598_2024_71047_MOESM1_ESM.pdf]

## Supplementary material

Manuscript: An unexpected IgE anti-Receptor Binding Domain response following natural infection and different types of SARS-CoV-2 vaccines

Suppl. 1 # Correlation analysis between IgE levels after two ChAdOx1 doses and Neutralizing indexes.

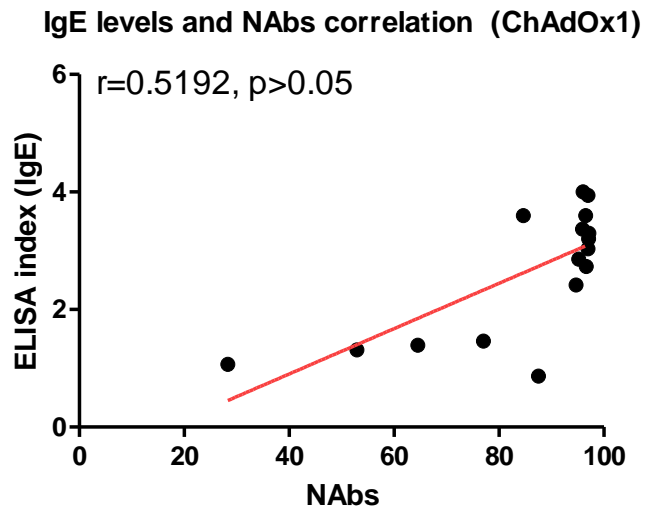

An intermediary correlation was observed.  $r=0.5192, p>0.05$  for ChAdOx1,  $n=16$  pairs.

Suppl. 2 # Correlation analysis of IgE levels after two CoronaVac doses and Neutralizing indexes.

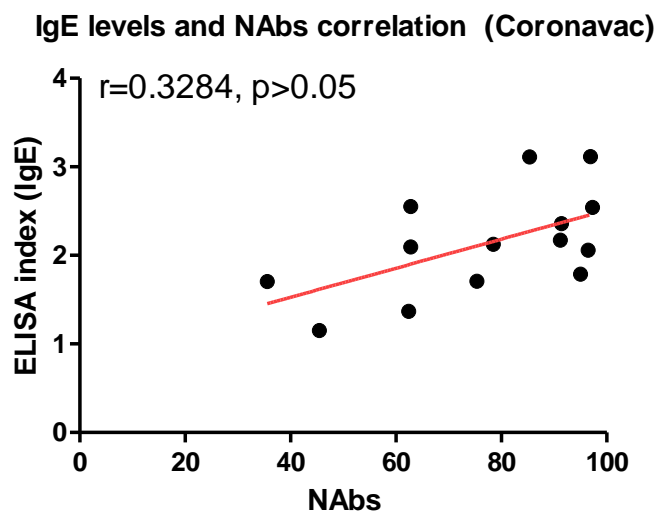

A positive, yet modest correlation was observed.  $r=0.3284, p>0.05, n=14$  pairs.
